# Supplementary material for: A novel bioreactor system for biaxial mechanical loading enhances the properties of tissue-engineered human cartilage
Source: PubMed Central journal article supplement (PMC5717235; doi:10.1038/s41598-017-16523-x), 2017-12-05
Supplement: 41598_2017_16523_MOESM1_ESM.pdf [file 41598_2017_16523_MOESM1_ESM.pdf]

# **A novel bioreactor system for biaxial mechanical loading enhances the properties of tissue-engineered human cartilage**

Christoph Meinert<sup>1,2</sup>, Karsten Schrobback<sup>1</sup>, Dietmar W. Hutmacher<sup>1,2</sup>, Travis J. Klein<sup>1,2\*</sup>

<sup>1</sup>Institute of Health and Biomedical Innovation, Queensland University of Technology, Brisbane, Queensland, 4059, Australia

<sup>2</sup>Australian Research Council Industrial Transformation Training Centre in Additive Biomanufacturing, Queensland University of Technology, Brisbane, Queensland 4059, Australia

## **Supplementary Information**

**Supplementary Video V1.** 3D animation illustrating the working principle of the novel shear and compression bioreactor system.
